# Supplementary material for: A global network of coexisting microbes from environmental and whole-genome sequence data
Source: HighWire-hosted journal article supplement (doi:10.1101/gr.104521.109), 2010-05-10
Supplement: Figure_S1.pdf [file Figure_S1.pdf]

A

**otu\_b49400:** 3 sequences, all within 97% sequence identity.  
No named relatives. Likely phylum: JS1

**otu\_a800:** 4 sequences, all within 97% sequence identity.  
Next named relative: *Methanosalsum*, at 87% identity.

|                                                      | otu_b49400 | otu_a800 |
|------------------------------------------------------|------------|----------|
| Lapham et al., hypersaline sediments, Gulf of Mexico | 1          | 2        |
| Boetius et al., marine sediments, Gulf of Mexico     | 1          | 1        |
| Forney et al., deep-sea sediments, Mediterranean     | 1          | 1        |

$p = 1.1 \cdot 10^{-07}$  (FDR; adjusted for multiple testing)

B

**otu\_b2012:** 158 sequences, all within 98% sequence identity.  
Includes 33 named isolates (*Stenotrophomonas/Xanthomonas*)

**otu\_b8:** 532 sequences, all within 98% sequence identity.  
Includes 22 named isolates (*Staphylococcus*)

|                                               | otu_b2012 | otu_b8 |
|-----------------------------------------------|-----------|--------|
| Blakesley et al., ear punch biopsy            | 2         | 1      |
| Chen et al., clean-room air                   | 51        | 2      |
| Cho et al., plant leaf                        | 1         | 2      |
| Dekas et al., clean-room air                  | 1         | 3      |
| Nevalainen et al., indoor dust                | 4         | 16     |
| Dekas et al., aircraft cabin air              | 1         | 5      |
| Andersen et al., endotracheal aspirate        | 1         | 1      |
| Chen et al., clean-room air                   | 9         | 1      |
| Blakesley et al., inner elbow skin            | 14        | 105    |
| Cho et al., plant root                        | 2         | 1      |
| independent occurrences in 49 further samples |           |        |

$p = 4.6 \cdot 10^{-10}$  (FDR; adjusted for multiple testing)

C

**otu\_b788:** 182 sequences, all within 90% sequence identity.  
Including 20 named isolates (*Acidithiobacillus*)

**otu\_b44:** 120 sequences, all within 90% sequence identity.  
Including 9 named isolates (*Leptospirillum*)

|                                                | otu_b788 | otu_b44 |
|------------------------------------------------|----------|---------|
| Abanto et al., acid water sample               | 1        | 1       |
| Aguilera et al., extreme acidic river          | 10       | 11      |
| Aguilera et al., acidic river                  | 11       | 10      |
| Aguilera et al., filaments from acidic river   | 32       | 45      |
| Amano et al., Biogenic Fe-oxyhydroxide nodules | 1        | 2       |
| Amils et al., extremely acidic environment     | 3        | 5       |
| Baker et al., acid mine drainage               | 2        | 1       |
| Chen et al., bioleaching heap                  | 7        | 3       |
| Chen et al., low-grade copper bioleaching heap | 2        | 4       |
| Dai et al., acid mine drainage                 | 4        | 3       |
| Gihring et al., subsurface water               | 1        | 3       |
| Hallberg et al., mine tailings                 | 2        | 3       |
| Hallberg et al., mine water                    | 1        | 1       |
| Hao et al., processed gold ore                 | 1        | 1       |
| He et al., acid mine drainage                  | 2        | 5       |
| Huo et al., acid mine drainage                 | 1        | 3       |
| Ito et al., corroded concrete sample           | 2        | 1       |
| Liu et al., bioreactor                         | 5        | 6       |
| Maier et al., mine tailings                    | 9        | 3       |
| Qiu et al., bioleaching pulp                   | 2        | 3       |
| independent occurrences in 19 further samples  |          |         |

$p = 6.5 \cdot 10^{-36}$  (FDR; adjusted for multiple testing)

D

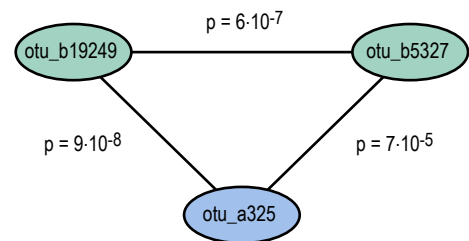

Delta-  
proteo-  
bacteria

**otu\_b19249:** 22 sequences, all within 90% sequence identity.  
Next named relative: *Desulfobulbus*, at 88% identity.

**otu\_b5327:** 101 sequences, all within 90% sequence identity.  
Including one named isolate (*Endosymbiont of *Olavius ilvae**)

Eury-  
archaeota

**otu\_a325:** 74 sequences, all within 90% sequence identity.  
No named relative. Designation: ANME-1

|                                           | otu_b19249 | otu_b5327 | otu_a325 |
|-------------------------------------------|------------|-----------|----------|
| Boetius et al., marine sediments          | 5          | 2         | 8        |
| Lapham et al., sediments                  | 2          | 3         | 5        |
| Beal et al., methane seep sediments       | 1          | 2         | -        |
| Boetius et al., hydrocarb. seep sediments | 1          | -         | 1        |
| Boetius et al., hydrocarb. seep sediments | -          | 1         | 1        |
| Forney et al., mud volcano                | 2          | 2         | 1        |
| Amann et al., sediment ab. hydrate ridge  | 1          | 5         | -        |
| Boetius et al., marine sediments          | 5          | 5         | 30       |
| independent occrs. in 47 further samples  |            |           |          |
