# Supplementary material for: A global network of coexisting microbes from environmental and whole-genome sequence data
Source: HighWire-hosted journal article supplement (doi:10.1101/gr.104521.109), 2010-05-10

**OTU definition: 97%**

| Stratified samples                             | samples <6 seqs | samples >6, <20 seqs | samples >20 seqs |
|------------------------------------------------|-----------------|----------------------|------------------|
| number of co-occurrence tests                  | 561,270         | 2,011,015            | 12,199,330       |
| number of coexisting OTUs pairs (FDR=0.001)    | 1               | 55                   | 51,161           |
| number of co-occurring OTUs with mapped genome | 0               | 8                    | 81               |
| Coexisting genomes pairs (FDR=0.001)           | 0               | 4                    | 169              |

| Down sampling                                  | max 50 seqs/sample | max 100 seqs/sample | max 500 seqs/sample |
|------------------------------------------------|--------------------|---------------------|---------------------|
| number of co-occurrence tests                  | 10,353,525         | 11,623,431          | 12,502,500          |
| number of coexisting OTUs pairs (FDR=0.001)    | 1,478              | 5,204               | 36,653              |
| number of co-occurring OTUs with mapped genome | 59                 | 74                  | 104                 |
| Coexisting genomes pairs (FDR=0.001)           | 54                 | 74                  | 183                 |

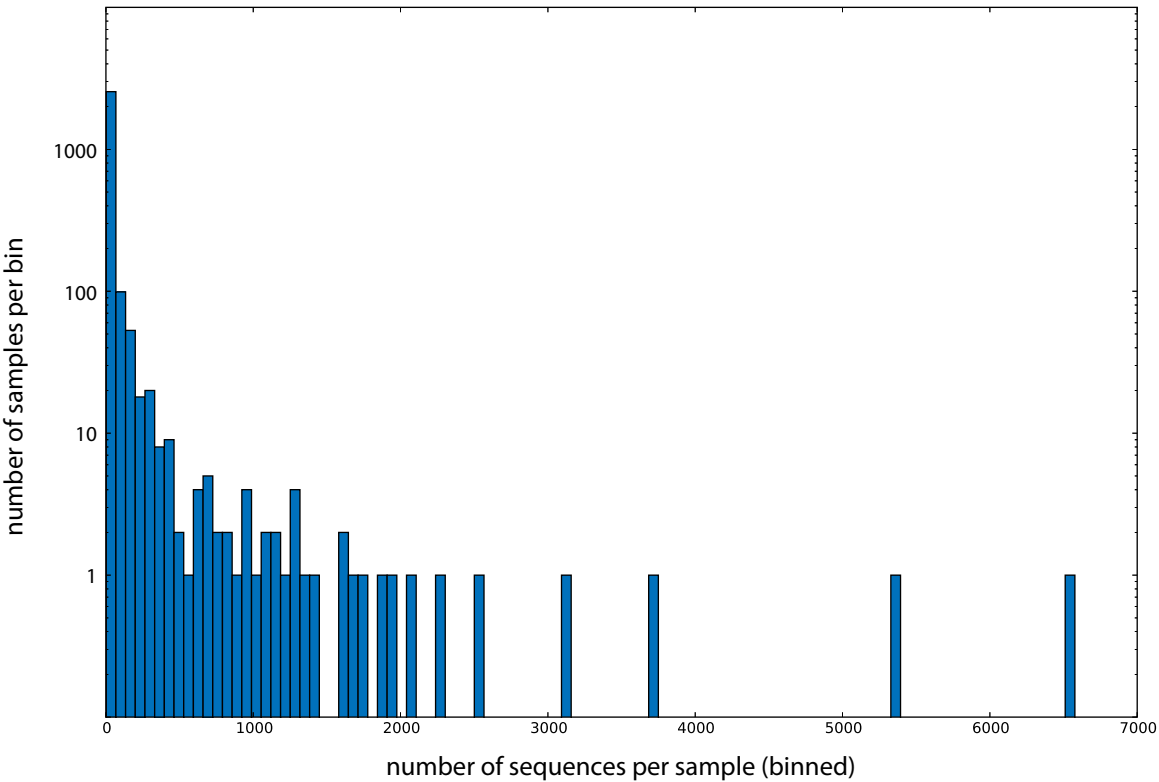

Supplement: Figure_S7.pdf [file Figure_S7.pdf]
