# Supplementary figures and images for: A global network of coexisting microbes from environmental and whole-genome sequence data
Source: HighWire-hosted journal article supplement (doi:10.1101/gr.104521.109), 2010-05-10

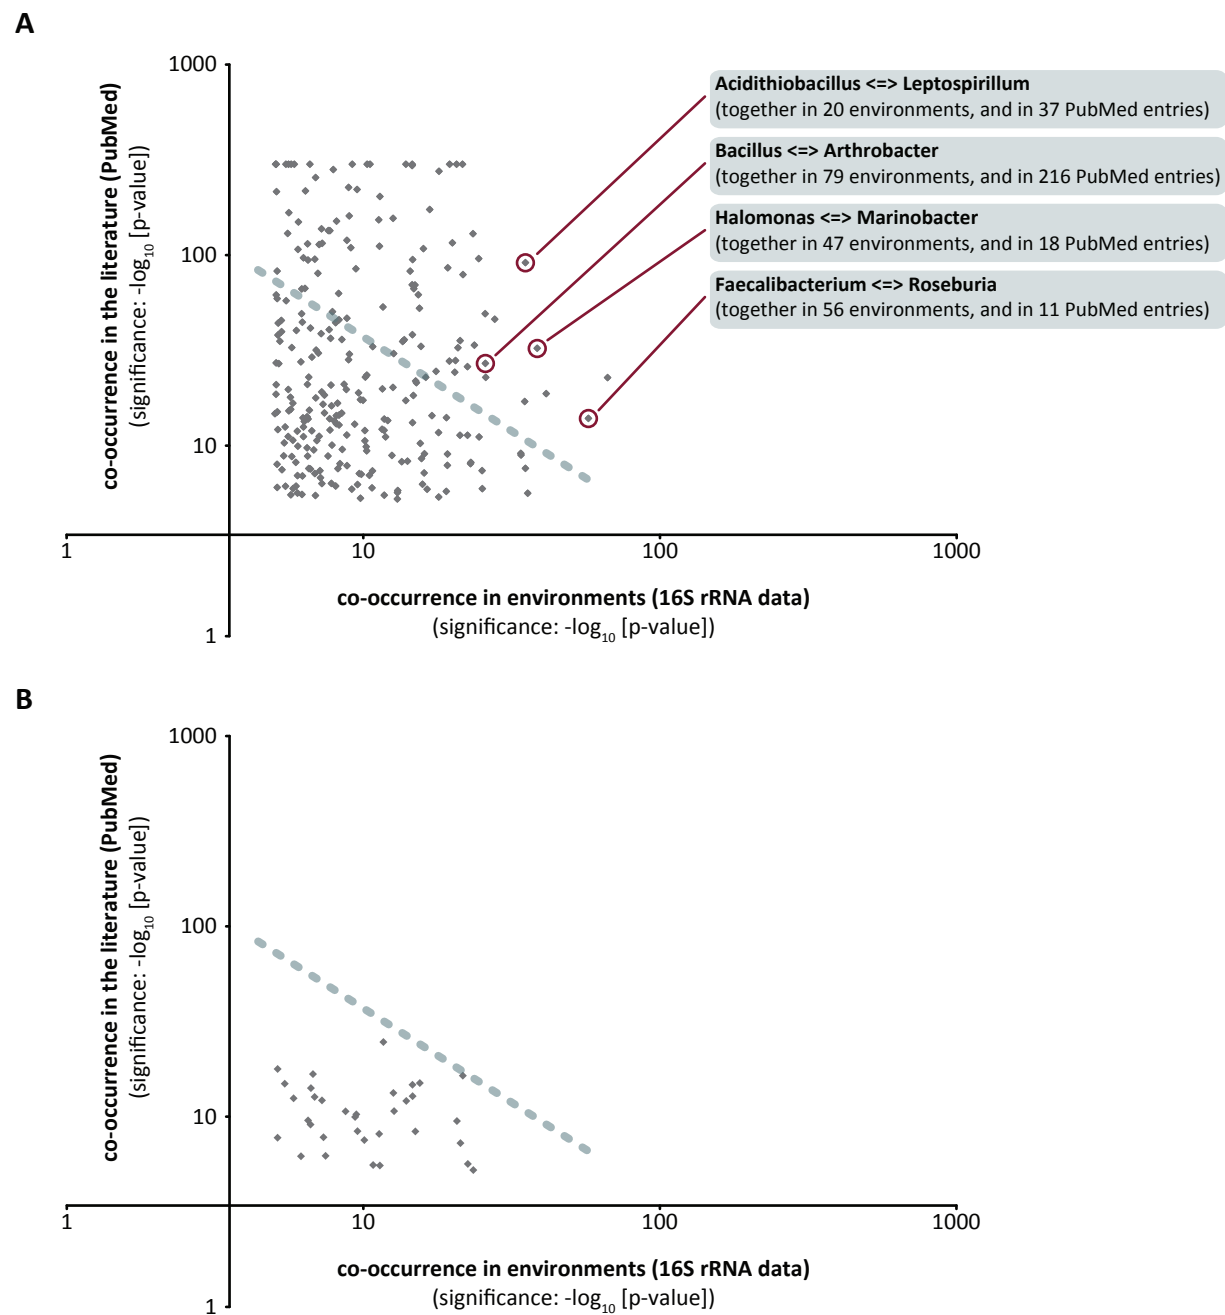

Supplement: Figure_S5.pdf [file Figure_S5.pdf]

- OTU definition: 98%
- Co-occurrence corrected p-value cut-off (FDR): 0.001

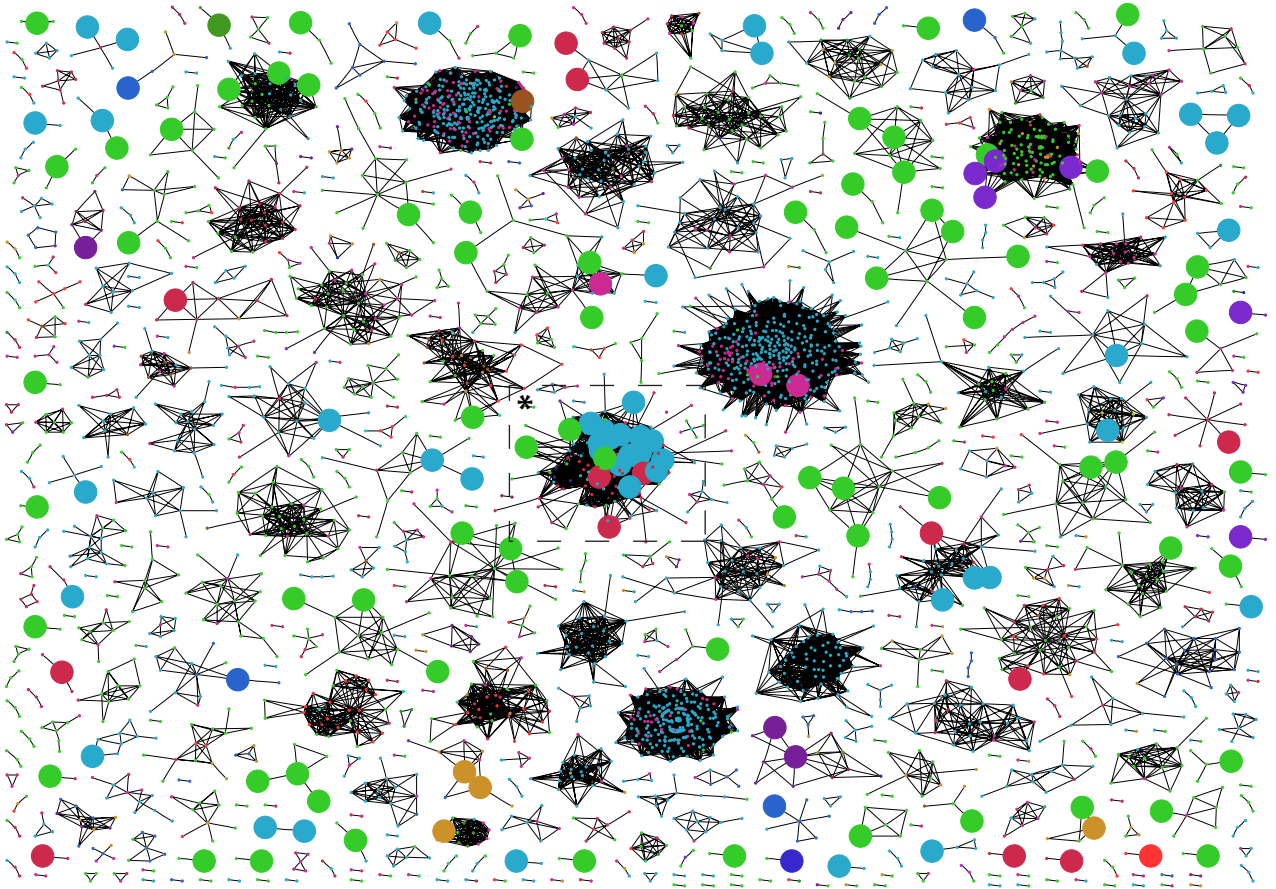

Supplement: Figure_S6.pdf [file Figure_S6.pdf]
